# Supplementary material for: Platelet-rich plasma versus hyaluronic acid in the treatment of knee osteoarthritis: a meta-analysis
Source: PubMed Central journal article supplement (PMC7488405; doi:10.1186/s13018-020-01919-9), 2020-09-11

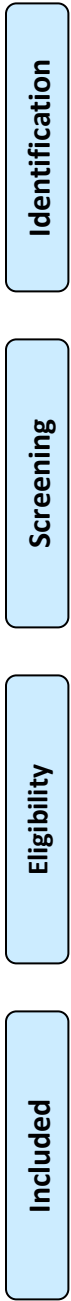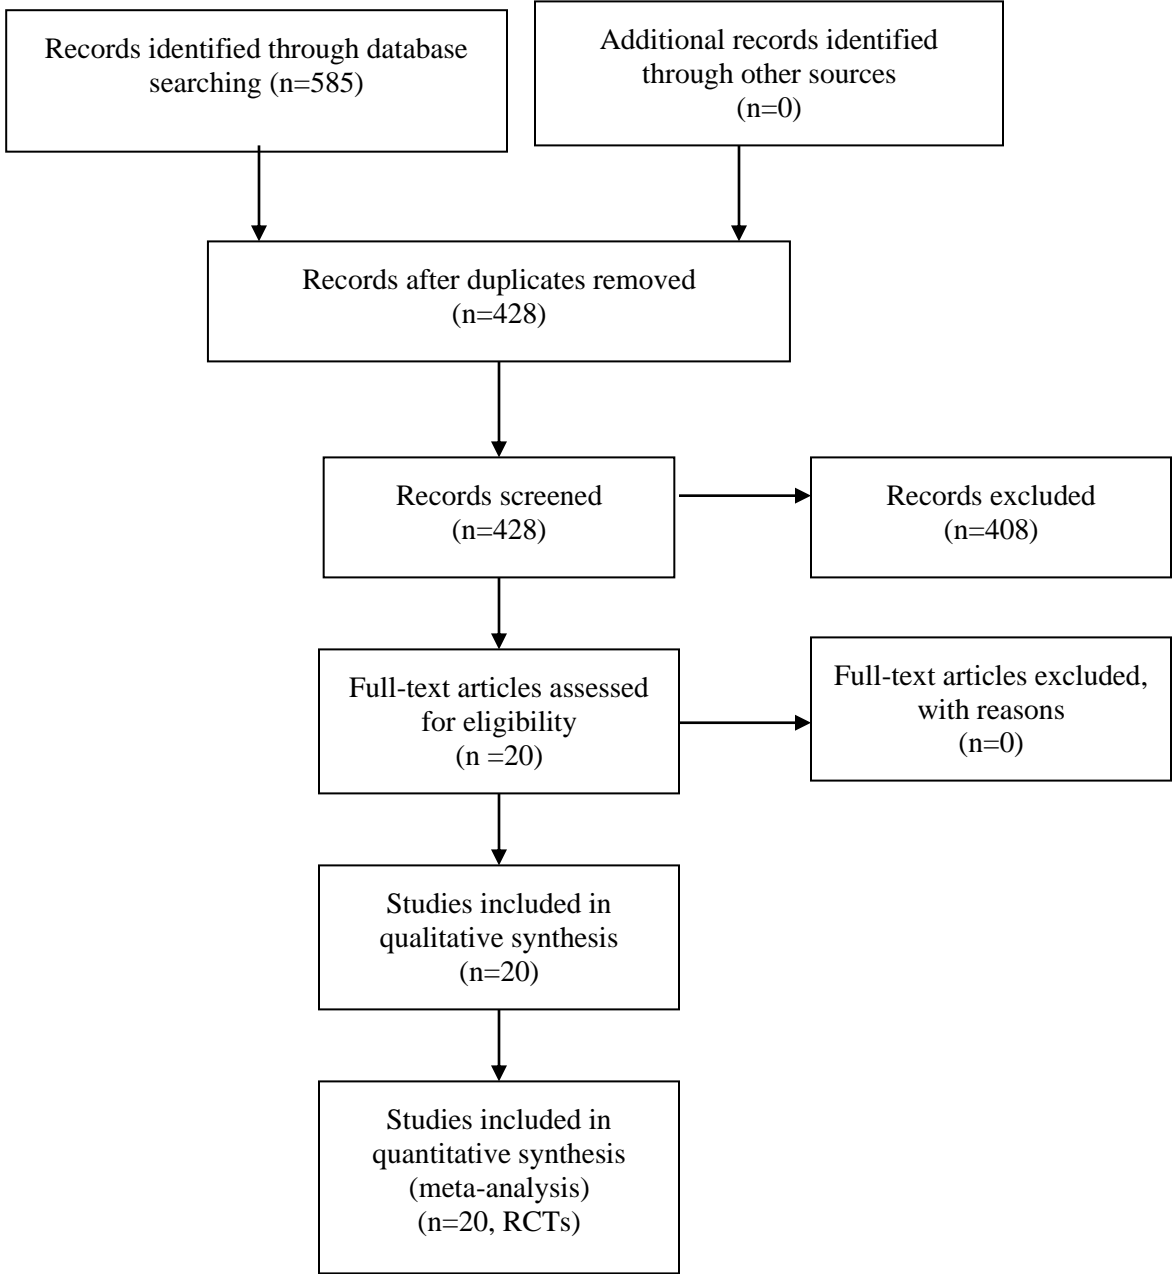

Supplement: 13018_2020_1919_MOESM2_ESM.pdf [file 13018_2020_1919_MOESM2_ESM.pdf]
